# Supplementary material
Source: Springer Nature journal article supplement (https://www.springermedizin.de/resource/supplementary/12967_2012_1046_MOESM6_ESM.pdf/9573606)

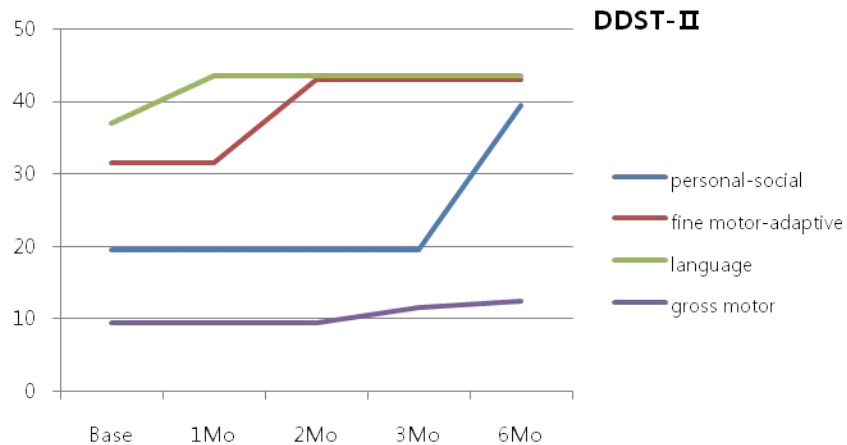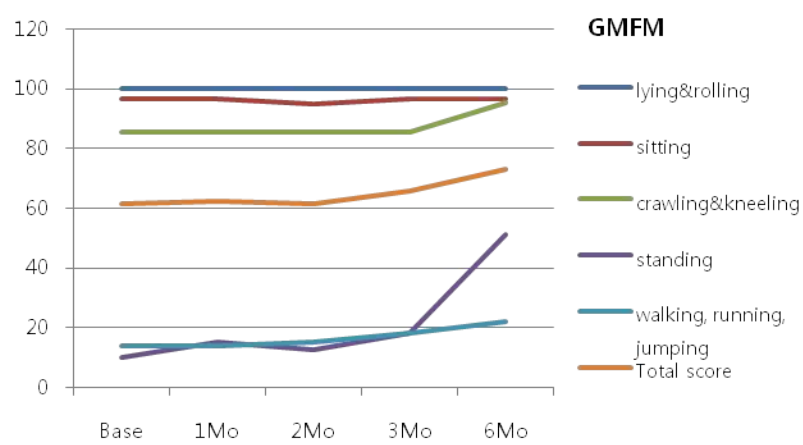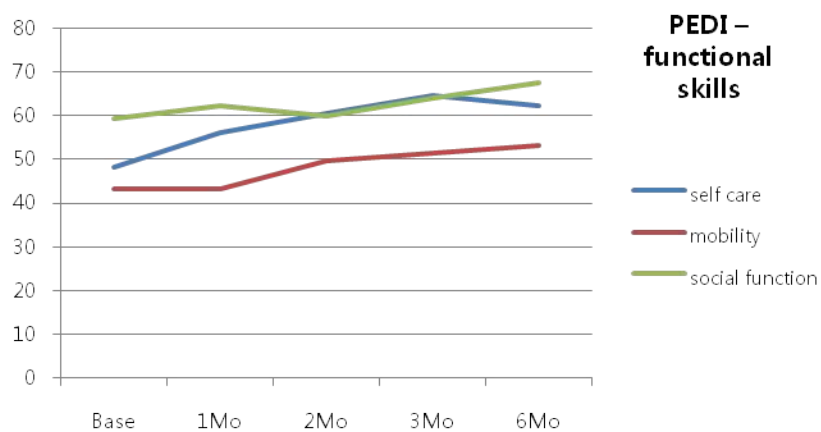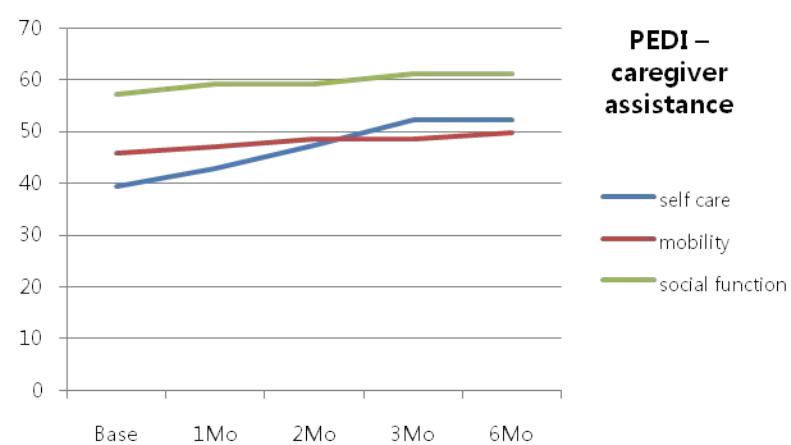

Supplement: MOESM6 [file 9573606]
